# Supplementary material
Source: publisher figshare collection journal article supplement (https://gsapubs.figshare.com/ndownloader/files/28496517)
Supplement: Supplementary file 1 [file 28496517]

## SUPPLEMENTAL MATERIAL

### Quaternary sodic and potassic intraplate volcanism in northeast China controlled by the underlying heterogeneous lithospheric structures

Xingli Fan<sup>1,2</sup>, Qi-Fu Chen<sup>1,4\*</sup>, Yinshuang Ai<sup>1,4\*</sup>, Ling Chen<sup>3,4</sup>, Mingming Jiang<sup>1,4</sup>, Qingju Wu<sup>5</sup> and Zhen Guo<sup>2</sup>

<sup>1</sup>Key Laboratory of Earth and Planetary Physics, Institute of Geology and Geophysics, Chinese Academy of Sciences, Beijing 100029, China

<sup>2</sup>Department of Ocean Science and Engineering, Southern University of Science and Technology, Shenzhen 518055, China

<sup>3</sup>State Key Laboratory of Lithospheric Evolution, Institute of Geology and Geophysics, Chinese Academy of Sciences, Beijing 100029, China

<sup>4</sup>College of Earth and Planetary Sciences, University of Chinese Academy of Sciences, Beijing 100049, China

<sup>5</sup>Institute of Geophysics, China Earthquake Administration, Beijing 100081, China

## INTRODUCTION

This supplemental material provides the detailed descriptions related to the seismic data (Table S1), seismic tomography methods (Figs. S1-S7 and Figs S9-S11), and resolution analyses including the traditional checkerboard test of phase velocity maps (Fig. S8) and synthetic restoring test of Vs models (Fig. S12). Seismic products generated in this study, consisting of the station-paired Rayleigh-wave phase velocity dispersion data used for the ambient noise tomography, intermediate 2-D Rayleigh-wave phase velocity models, and the final 3-D S-wave velocity model are all archived in the Seismic Array Laboratory, IGGCAS (doi:10.12129/IGGSL.Data.Observation, <http://www.seislab.cn/>), which can be downloaded via <ftp://159.226.119.161/data/NECsaid/NE-China-Tomo-Data>.



## SEISMIC DATA

Seismic waveforms used in this study are collected from one permanent network and seven portable arrays, consisting of 145 permanent CEA stations (Zheng et al., 2010), 127 portable NECESSArray stations (Tao et al., 2014), 60 portable NECsaids stations (Wang et al., 2016), 40 portable NECsaids3 stations (Zhang et al., 2020), 42 portable WDLC stations (Lu et al., 2020), 20 portable DXAL stations (Peng et al., 2019), 6 portable XM stations (Zhang and Wu, 2019), and 6 portable NK stations (Ri et al., 2016). Detailed information about the number of stations and operating time range for each network is summarized below in Table S1.

| <i>Network name</i> | <i>Number of stations</i> | <i>Operating time range</i> |
|---------------------|---------------------------|-----------------------------|
| CEA                 | 145                       | 2009.09-2018.06             |
| NECESSArray         | 127                       | 2009.09-2011.08             |
| NECsaidS            | 60                        | 2010.07-2017.09             |
| NECsaidS3           | 40                        | 2016.10-2018.10             |
| WDLC                | 42                        | 2015.06-2018.05             |
| DXAL                | 20                        | 2015.07-2017.06             |
| XM                  | 6                         | 2015.07-2017.05             |
| NK                  | 6                         | 2013.08-2015.10             |

**Table S1.** Detailed information about the seismic data used in this study.



## 41 **AMBIENT NOISE TOMOGRAPHY**

42 To extract fundamental mode Rayleigh-wave Empirical Green's Functions (EGFs) from the  
43 cross-correlations of ambient noise between pairs of stations, we adopt the data processing  
44 procedures previously described by Bensen et al. (2007) in detail. Here we briefly outline the  
45 major steps. For each station, vertical components of the raw continuous data are cut to daily  
46 segments and then decimated to 1 Hz. A band-pass filter of 2-100 s is applied to the resulting  
47 data after the corresponding instrument responses are removed. Running average time  
48 domain normalization and spectral whitening are employed to remove the effects of  
49 significant earthquakes, possible instrumental irregularities, and also broaden the bandwidth  
50 of the ambient noise. Daily ambient noise cross-correlations for each station pair are  
51 computed in the frequency domain and then stacked to obtain the final station-paired cross-  
52 correlation. Figure S1A shows an example of cross-correlation records between station MDJ  
53 (red triangle in Figure S1B) and all other stations. Clear Rayleigh-waves emerging in both the  
54 positive and negative lags with a nearly symmetric shape as shown in Figure S1A testify the  
55 high quality of our retrieved ambient noise cross-correlations.

56 In order to enhance the signal-to-noise ratio (SNR), positive and negative lags of the final  
57 station-paired cross-correlation are combined together to produce the so-called "symmetric  
58 component" (Bensen et al., 2007). Then, we perform the automatic frequency-time analysis  
59 (Levshin and Ritzwoller, 2001) to determine the phase velocity dispersion curves at the period band  
60 of 3-60 s. Phase velocity measurements with the SNR (as defined in Bensen et al. (2007)) smaller  
61 than 15 and the interstation spacing less than two wavelengths are discarded prior to further  
62 analysis. 2-D phase velocity maps are then generated utilizing a ray theory-based tomography  
63 method developed by Barmin et al. (2001). This tomographic method is based on minimizing a  
64 penalty function that depends on the smoothing damping parameter  $\alpha$ , path density damping  
65 parameter  $\beta$ , and Gaussian smoothing parameter  $\sigma$ . During the inversion, these regularization  
66 parameters are chosen to optimize the agreement with the maps derived from the following  
67 earthquake tomography at overlapped periods. In this study, after a series of inversion tests, we  
68 set the values of  $\alpha$ ,  $\beta$ , and  $\sigma$  to be 600, 1, and 80. After conducting the trial inversion to obtain  
69 overly smoothed phase velocity maps, we compute the travel-time residual for each ray path and



70 the outliers with travel-time residual larger than the two-standard-deviation value are rejected  
 71 before the final inversion.

72 Figure S2A shows the number of ray paths as a function of period for the final inversion. The  
 73 number of ray paths is larger than 10,000 throughout the period band and reaches the peak of  
 74 around 65,000 at 15 s. The travel-time residual distribution at the period of 20 s, which centers  
 75 near zero with a small standard deviation (STD less than 1 s) as shown in Figure S2B, statistically  
 76 indicates that unrealistic measurements and significant outliers have been effectively removed.  
 77 Phase velocity maps at selected periods (6 s, 10 s, 20 s, 30 s, 40 s and 50s) resulted from the  
 78 ambient noise tomography are displayed in Figure S3. Additionally, six raw dispersion curves  
 79 running through the CBS, JPH, ABG, HLH, NMH, and WDLC volcanoes are plotted in Figure S4. We  
 80 can see that the phase velocities sampling the potassic volcanoes (NMH and WDLC) is  
 81 systematically higher than the phase velocities sampling the sodic volcano (CBS, JPH, ABG and HLH),  
 82 which is consistent with the 2-D phase velocity maps (Fig. S3) showing generally high-velocity  
 83 anomalies around the potassic volcanoes and low-velocity anomalies surrounding the sodic  
 84 volcanoes.

85

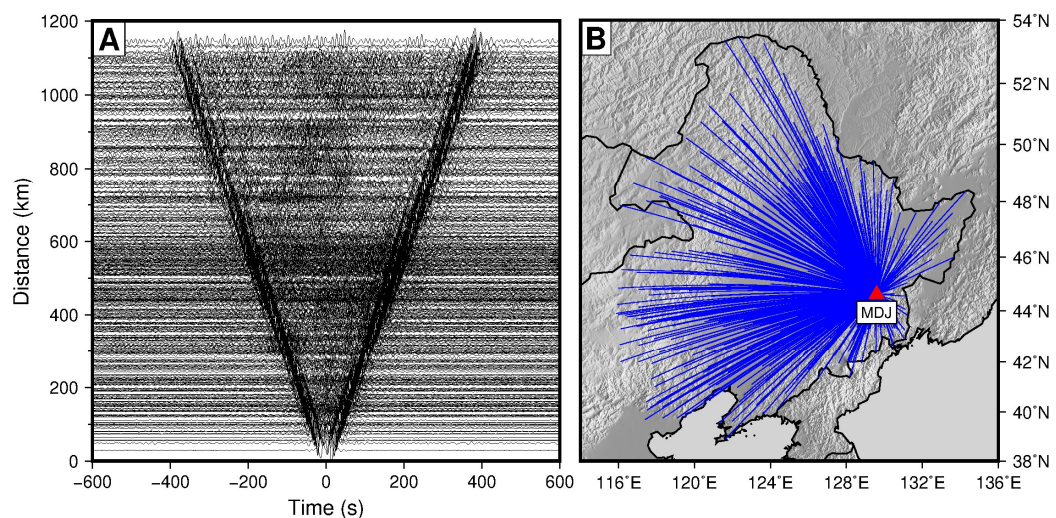

86

87 **Figure S1.** (A) An example of ambient noise cross-correlations between station MDJ (red  
 88 triangle in B) and all other stations. (B) Corresponding inter-station ray paths between station  
 89 MDJ and all other stations.

90

91



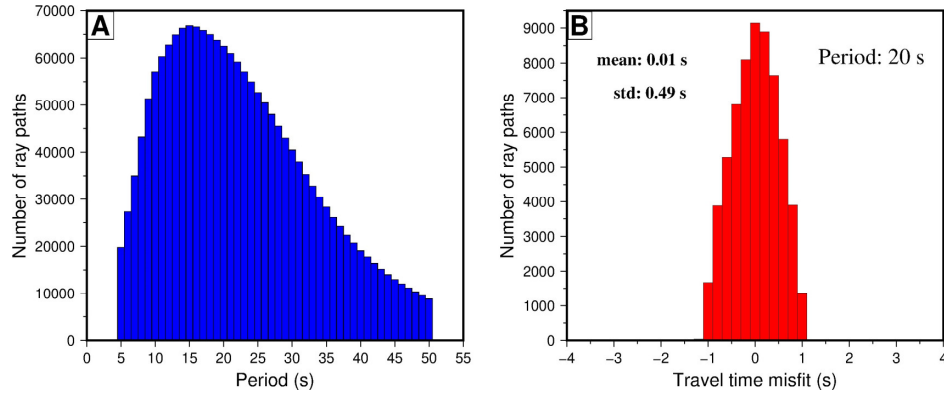

**Figure S2.** (A) Number of ray paths for the final inversion of ambient noise tomography as a function of period. (B) Travel-time residual histogram at the period of 20 s resulted from the final inversion of ambient noise tomography.

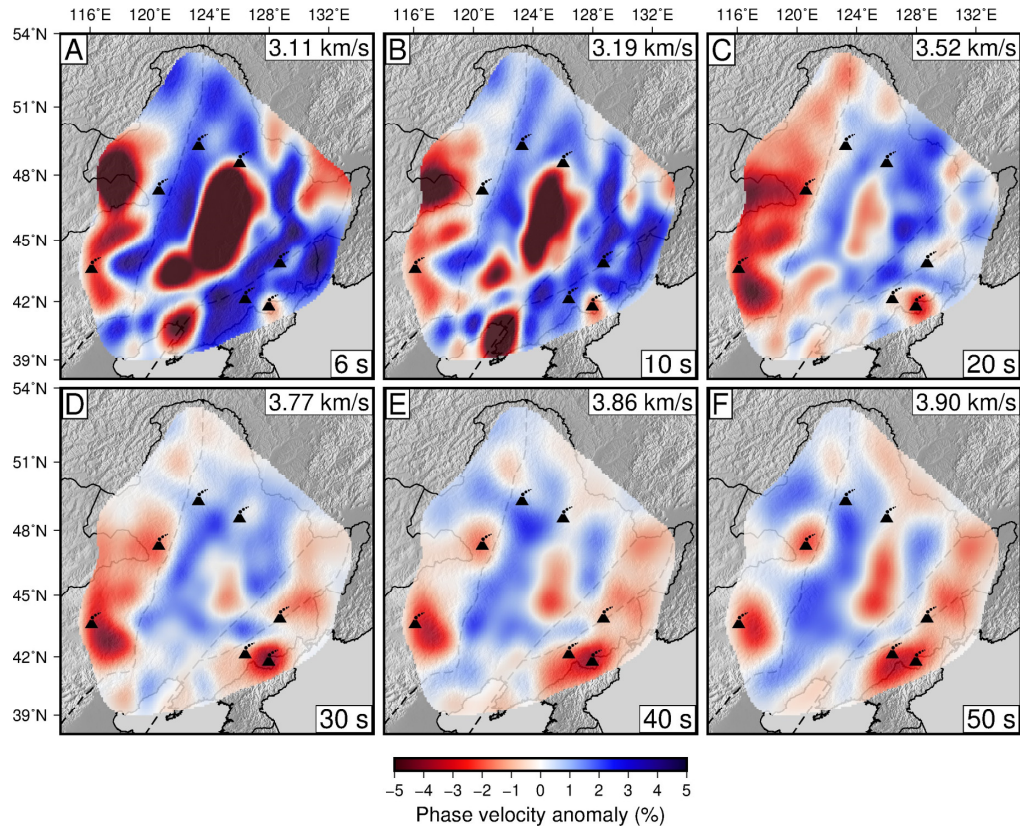

**Figure S3.** Phase velocity anomaly maps derived from the ambient noise tomography. The dashed lines are the North-South Gravity Lineament and Tanlu Fault as shown in Figure 1A. The black volcano symbols mark the Quaternary intraplate volcanoes with the distribution of their volcanic outcrops shown in Figure 1A. In each panel, the period and corresponding average phase velocity are labeled at the bottom-right and top-right corners, respectively.



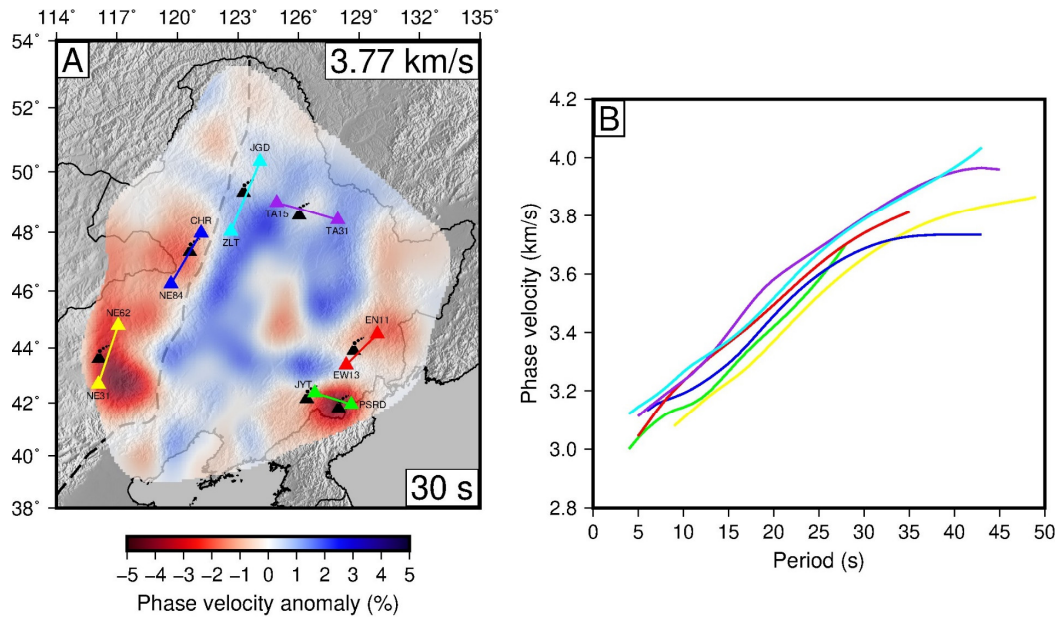

103  
 104 **Figure S4.** (A) shows the surface locations of the selected six station pairs (color coded lines)  
 105 with their corresponding phase velocity dispersion curves plotted in (B). The background color  
 106 image displayed in (A) is the phase velocity anomaly map at 30 s derived from the ambient  
 107 noise tomography (Fig. S3D).  
 108



## EARTHQUAKE TWO-PLANE WAVE TOMOGRAPHY

To extend the phase velocity range and therefore increase the resolvable depth of our  $V_s$  model, we perform the two-plane wave tomography (Forsyth and Li, 2005; Yang and Forsyth, 2006) to derive the fundamental mode Rayleigh-wave phase velocity maps at periods between 30 s and 143 s using teleseismic surface wave data. The two-plane wave tomography simulates the wavefield across the study region by the interference of two incoming plane waves (Yang and Forsyth, 2006). A 2-D finite frequency phase sensitivity kernel (Zhou et al., 2004) is employed to account for the sensitivities of surface waves to structural heterogeneities. The Gaussian length value used to smooth the 2-D sensitivity kernels, which has great effects on the model resolution and variance, is set as 80 km in this study to optimize the agreement with the maps derived from the previous ambient noise tomography at overlapped periods. A total of 629 earthquakes (Fig. S5A) with epicentral distance between  $30^\circ$  and  $120^\circ$ , magnitude greater than 6.0, and focal depth less than 50 km are collected to retrieve the fundamental mode Rayleigh-waves. Vertical seismograms with the SNR of teleseismic Rayleigh-wave signals less than 10 are discarded prior to further analysis. The selected earthquakes as shown in Figure S5A display a good azimuthal coverage in general with a slightly poor coverage to the east.

Since the assumption of two incoming plane waves would break down if the simulated single wavefield becomes too large (e.g., larger than  $1,000 \times 1,000 \text{ km}^2$  in this study), we divide our study region into four subregions and then model the incoming wavefield in each subregion using two plane waves. The whole study area is parameterized using a 2-D spatial grid with a node spacing of  $0.5^\circ$ . The inversion for 2-D phase velocity maps is invoked twice. First, we invert for the average phase velocity at each period and use it to calculate the updated 2-D sensitivity kernels. Second, we remove the outliers with phase travel-time misfit larger than 5 s from the surface wave dataset and then perform the inversion again to obtain the final 2-D phase velocity maps. The number of ray paths as a function of period retained after data selection is shown in Figure S5B. The number of remaining paths is larger than 4,000 at all periods and reaches the peak of around 20,000 at 45 s. Figure S6 exhibits the phase velocity maps at selected periods (30 s, 40 s, 60 s, 83 s, 111 s and 143 s) derived from the earthquake two-plane wave tomography.



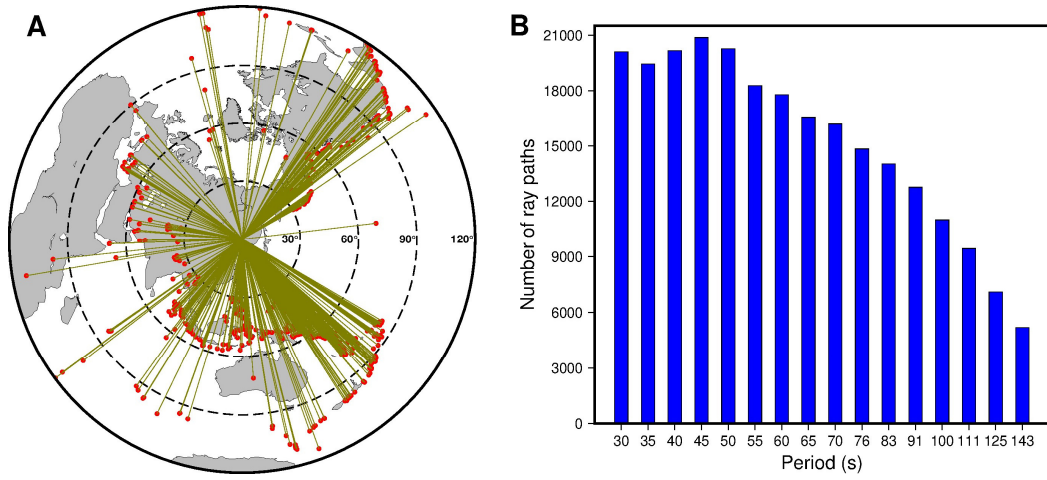

**Figure S5.** (A) Azimuthal distribution of teleseismic earthquakes (red dots) used in the two-plane wave tomography. (B) Number of ray paths for the two-plane wave tomography as a function of period.



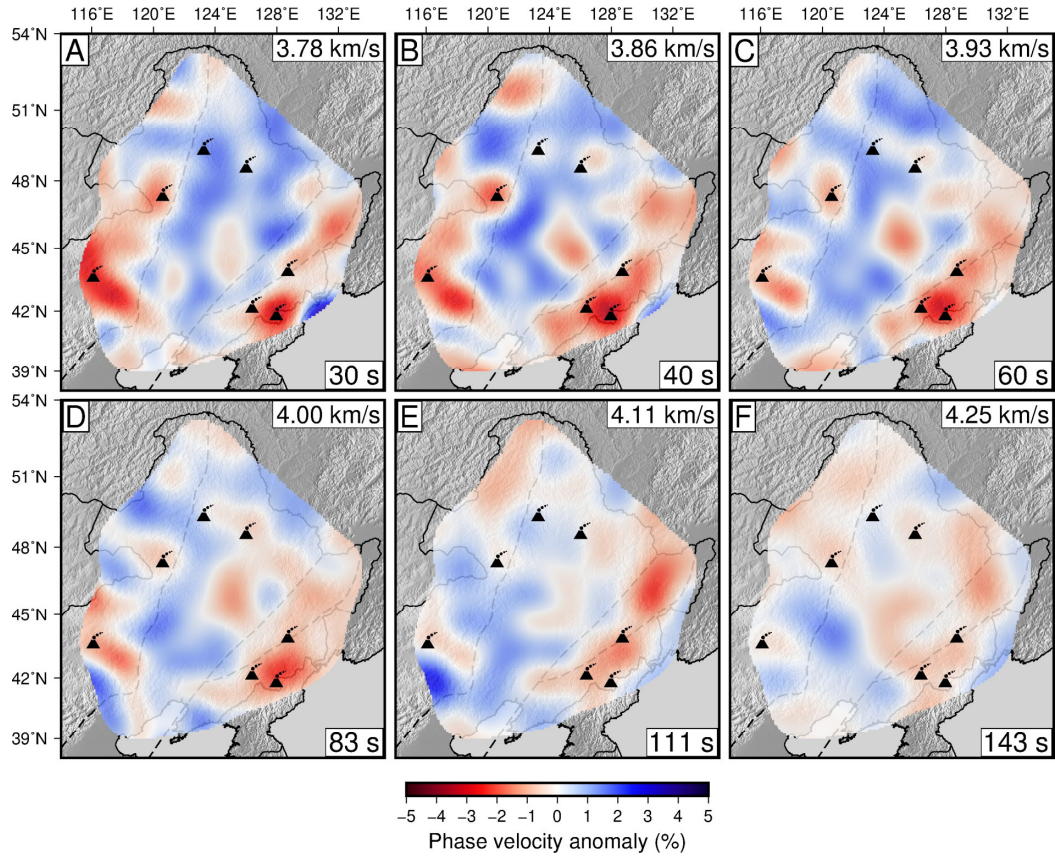

143  
 144 **Figure S6.** Phase velocity anomaly maps derived from the earthquake two-plane wave  
 145 tomography. The dashed lines are the North-South Gravity Lineament and Tanlu Fault as  
 146 shown in Figure 1A. The black volcano symbols mark the Quaternary intraplate volcanoes with  
 147 the distribution of their volcanic outcrops shown in Figure 1A. In each panel, the period and  
 148 corresponding average phase velocity are labeled at the bottom-right and top-right corners,  
 149 respectively.

150

151



## 152 **COMPARISON OF PHASE VELOCITY MAPS AT OVERLAPPED PERIODS**

153       We compare the phase velocity maps derived from the ambient noise and earthquake  
154 two-plane wave tomography, and find they are quite consistent with each other. Figure S7  
155 displays the comparison of phase velocity and corresponding uncertainty between the two  
156 different methods at the overlapped period of 40 s. The mean difference and the standard  
157 deviation of the phase velocity difference between the two maps are 3.4 m/s and 27.5 m/s,  
158 respectively (Fig. S7F). The uncertainty for the ambient noise tomography (Fig. S7C) increases  
159 considerably towards the periphery of the study region due to reduced crossing ray coverage,  
160 whereas the uncertainty for the earthquake two-plane wave tomography (Fig. S7D) is generally  
161 evenly distributed throughout the study region since the used earthquakes that generate the  
162 incoming rays are located outside the study region from all directions.

163



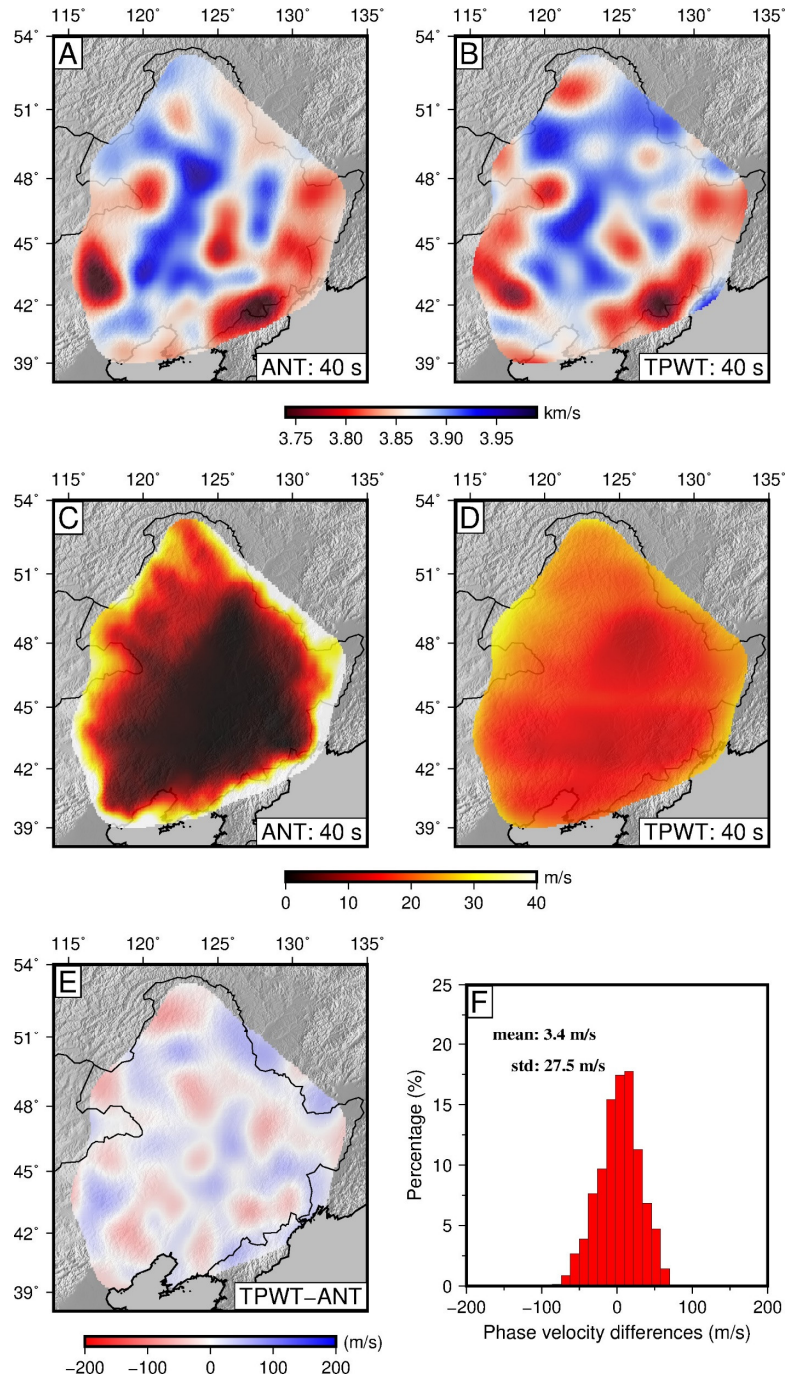

164  
 165 **Figure S7.** Comparison between the 40 s phase velocity maps derived from the ambient noise  
 166 tomography (A) and earthquake two-plane wave tomography (B) with the corresponding  
 167 uncertainty maps shown in (C) and (D). (E) The difference of phase velocity maps between the  
 168 two methods (ambient noise tomography subtracted from earthquake two-plane wave  
 169 tomography). (F) Histogram of phase velocity differences between the two methods. The  
 170 mean difference and standard deviation of the difference are indicated inside the panel.



## 171 **CHECKERBOARD RESOLUTION TEST**

172       Conventional checkerboard tests are conducted to evaluate the resolution of our inverted  
173 phase velocity models (Fig. S8). The input model (Fig. S8A) consists of alternating positive and  
174 negative velocity anomalies of  $\pm 5\%$  with a cell size of  $1.5^\circ \times 1.5^\circ$  (corresponding to anomaly  
175 with the spatial dimension of around  $150 \text{ km} \times 150 \text{ km}$ ). The ray path distribution for the  
176 synthetic computation of phase velocities and regularization employed in the synthetic  
177 inversion are all kept the same as the real inversion. For the ambient noise tomography, the  
178 input model is largely recovered throughout the period band with some smearing effects  
179 observed at the edges of the study region owing to the relatively insufficient ray coverage (Figs.  
180 S8A-S8E). For the earthquake two-plane wave tomography, the input model is generally well  
181 recovered, although the magnitude of anomaly and model resolution degrade noticeably as  
182 period increases (Figs. S8F-S8I), which can be explained by the depreciated structural  
183 sensitivity of Rayleigh-waves at longer periods.



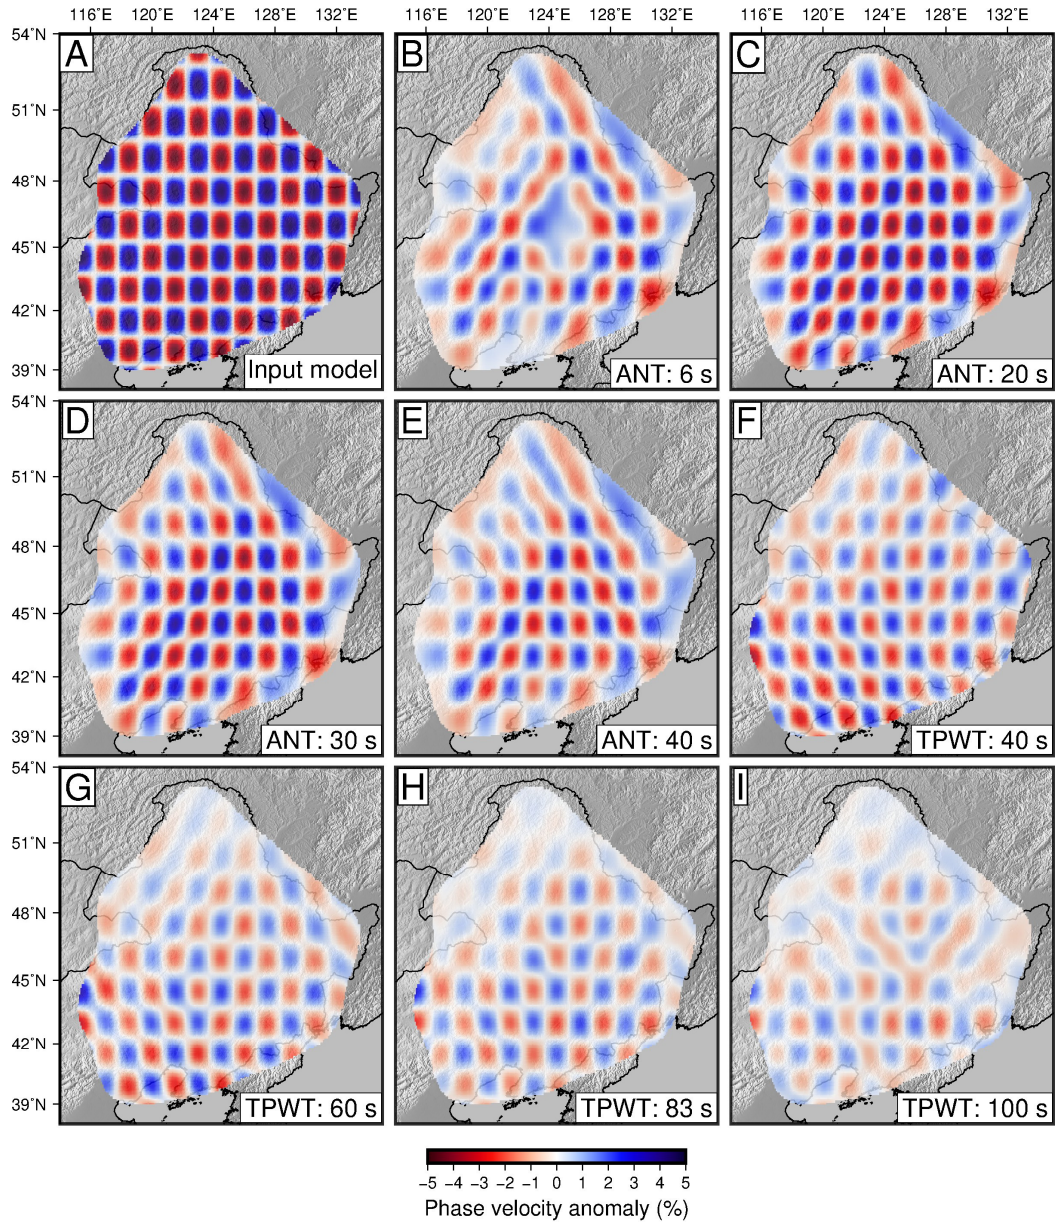

184  
 185 **Figure S8.** Checkerboard test for the ambient noise tomography (ANT) and earthquake two-  
 186 plane wave tomography (TPWT). (A) Input model consisting of velocity anomalies of  $\pm 5\%$  with  
 187 a cell size of  $1.5^\circ \times 1.5^\circ$ . (B-E) Recovered models for the ambient noise tomography at different  
 188 periods. (F-I) Recovered models for the earthquake two-plane wave tomography at different  
 189 periods.

190  
 191



## 192 **S-WAVE VELOCITY STRUCTURE INVERSION**

### 193 ***Inversion approach and model parameterization***

194       Local dispersion curve at each  $0.5^\circ \times 0.5^\circ$  grid node is extracted by combining phase  
195 velocities derived from the ambient noise and earthquake two-plane wave tomography at the  
196 period band of 6-143 s. For periods shorter than 40 s and longer than 50 s, the corresponding  
197 phase velocities are purely taken from the ambient noise and earthquake two-plane wave  
198 tomography, respectively. At the overlapped period band of 40-50 s, we take a linearly  
199 weighted average of phase velocities from the two datasets. This means that as period  
200 increases from 40 to 50 s, the relative weights assigned to the ambient noise data and  
201 earthquake two-plane wave data linearly decrease from 1 to 0 and increase from 0 to 1,  
202 respectively. After performing two tests with only one or the other phase velocity chosen from  
203 the two datasets at the 40-50 s period band in the  $V_s$  inversion, we found that the two resultant  
204  $V_s$  images are both nearly identical to the previous images (Figs. 2 and 3) without any  
205 noticeable differences. This implies that the weighting scheme invoked at the overlapped  
206 period band actually has little effect on the final  $V_s$  inversion results, since the phase velocity  
207 structures derived from the two methods are very similar to each other at overlapped periods  
208 (Figs. S7A and S7B) and the standard deviation of the difference between the two maps (Fig.  
209 S7F) is generally comparable to the standard deviation of each individual method (Figs. S7C  
210 and S7D).

211       1-D  $V_s$  profile beneath each individual node is obtained by inverting the extracted local  
212 dispersion curve with a Markov chain Monte Carlo inversion algorithm (Guo et al., 2016). The  
213 1-D  $V_s$  structure is parameterized as a sedimentary layer, a crystalline crustal layer and a  
214 mantle layer down to 300-km depth with four and five B-spline coefficients employed to  
215 describe the velocity variations in the crystalline crust and upper mantle, respectively. The  
216 thicknesses of the sedimentary and crystalline crustal layers are set as unknowns and inverted  
217 simultaneously with the S-wave velocities. During the inversion, the priori searching range of  
218 S-wave velocity is set to be  $\pm 20\%$  relative to the starting PREM model (Dziewonski and  
219 Anderson, 1981). The initial thickness of the sedimentary layer is retrieved from the CRUST1.0  
220 model (Laske et al., 2013), and the Moho is allowed to vary  $\pm 3$  km from the starting model



221 constrained by a previous receiver function study of He et al. (2014). Crustal  $V_p/V_s$  ratio is also  
222 taken from He et al. (2014), and in the upper mantle,  $V_p/V_s$  ratio is set as a constant of 1.732.  
223 Then, the local 1-D  $V_p$  profile is scaled from the  $V_s$  structure based on the  $V_p/V_s$  ratio. Local 1-  
224 D density profile is related to  $V_p$  using the Birch's law (Birch, 1961). Physical dispersion  
225 correction is applied to our  $V_s$  model based on the attenuation ( $Q$ ) values from the PREM  
226 model (Dziewonski and Anderson, 1981). One additional constraint is that the velocity jump  
227 across the Moho is required to be positive (i.e. mantle  $V_s >$  lower crustal  $V_s$ ). For each grid  
228 node, the resulting 1-D  $V_s$  model is determined from the statistics of the posterior probability  
229 density function (PDF) using the last 3,000 accepted models in the Markov chain.

230

### 231 ***1-D and 3-D $V_s$ models***

232 Examples of three inverted 1-D  $V_s$  profiles and corresponding posterior PDFs at selected  
233 points located at the CBS, WDLC and SLB (green dots in Figure 2F) are plotted in Figures S9B,  
234 S9D and S9F, respectively. Predicted surface wave dispersion curves are shown as thin gray  
235 lines along with the observations represented by blue and red dots for the ambient noise and  
236 earthquake two-plane wave tomography, respectively (Figs S9A, S9C and S9E). For comparison,  
237 the inverted 1-D  $V_s$  profiles for the three selected grid nodes, and the regional averaged 1-D  
238  $V_s$  profile are depicted in Figure S10. As illustrated in Figure S10, 1-D  $V_s$  profile beneath the  
239 CBS volcano shows significant low velocities both in the crust and upper mantle compared to  
240 the regional average, whereas 1-D  $V_s$  profile beneath the WDLC volcano is generally close to  
241 the regional average. The final 3-D  $V_s$  model of NE China is constructed by assembling all the  
242 1-D  $V_s$  profiles in the study region. Vertical profiles (with the surface locations indicated in  
243 Figure 1A) of  $V_s$  perturbations calculated relative to the regional average (black line in Figure  
244 S10) is plotted in Figure S11. Horizontal slices and cross sections of absolute  $V_s$  are displayed  
245 in the main text as Figure 2 and Figure 3, respectively.

246



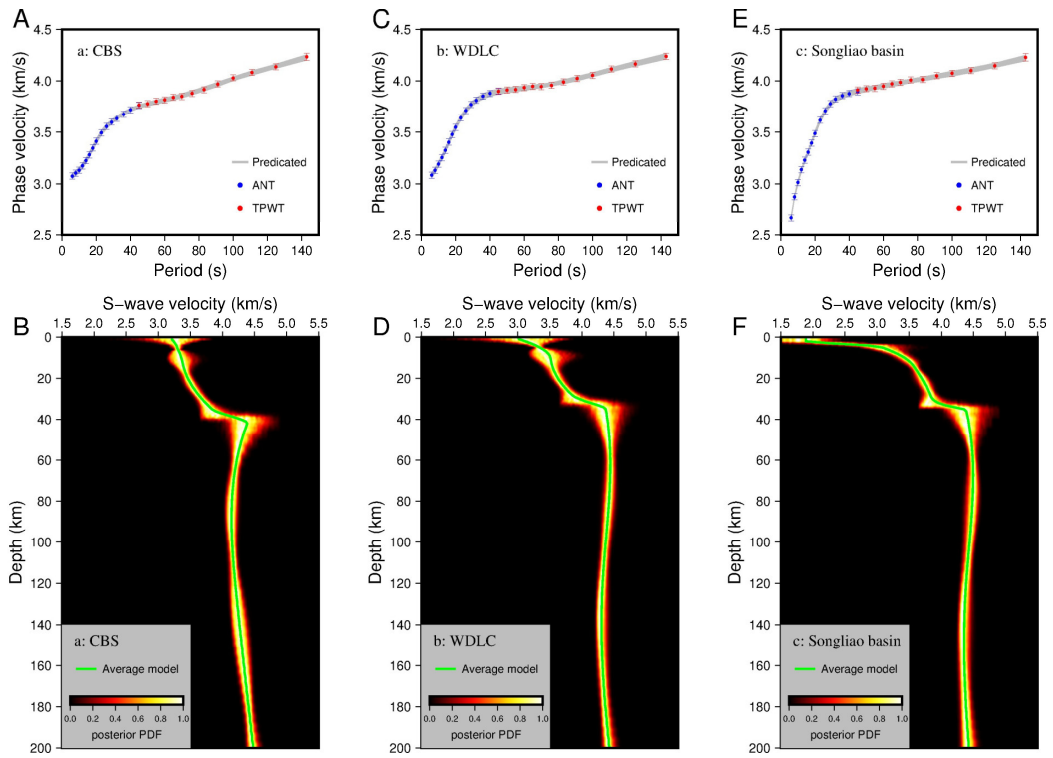

**Figure S9.** (A, C, E) The blue and red dots represent the observed Rayleigh-wave phase velocity dispersion data from the ambient noise and two-plane wave tomography, respectively, with their locations shown in Figure 2F (green stars). The thin gray lines display the predicted Rayleigh-wave phase velocity dispersion curves calculated from the 3,000 accepted models. (B, D, F) Ensembles of 1-D Vs models inverted from the observed Rayleigh-wave phase velocity dispersion data as shown in A, C and E, respectively. The color scale stands for the normalized posterior PDF, in which lighter color corresponds to higher probability distribution of the Vs. The thick green line represents the averaged model from the 3,000 best fit samples.



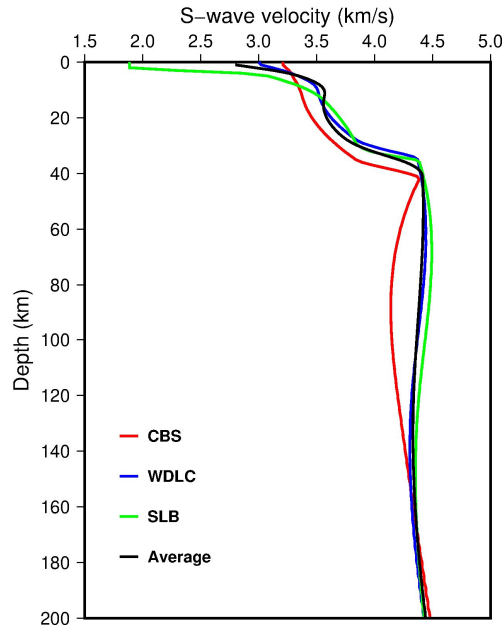

**Figure S10.** The red, blue and green lines represent the 1-D Vs profiles (also shown in Figures S9B, S9D and S9F) for the three grid nodes (marked as green stars in Figure 2F) located at the CBS, WDLC and SLB, respectively. The black line shows the regional average 1-D Vs profile.

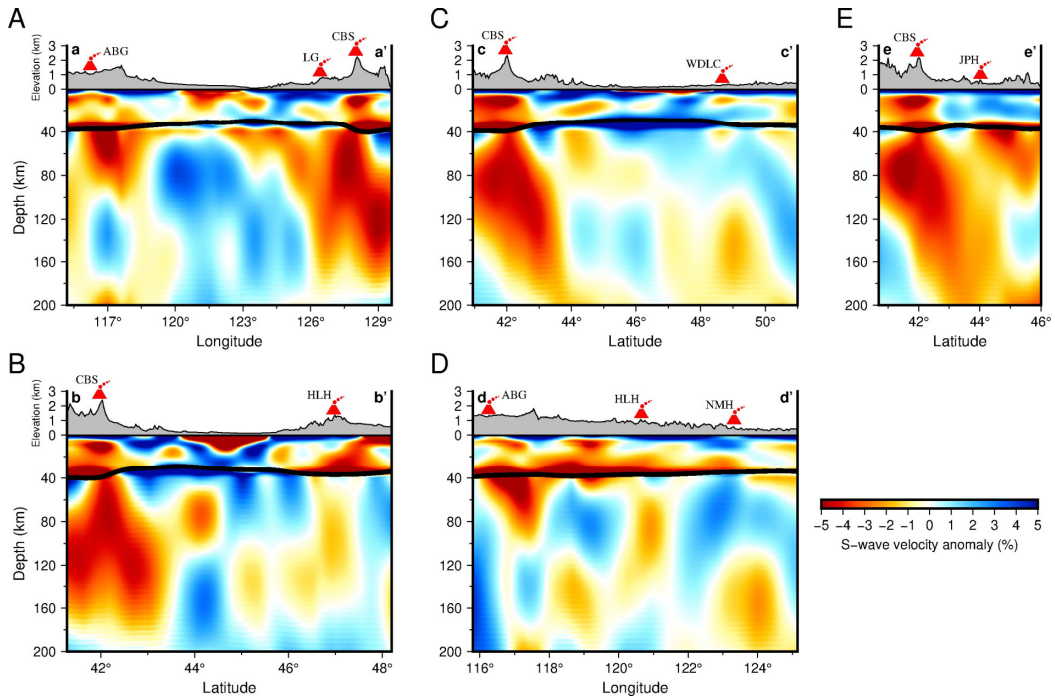

**Figure S11.** Cross-sectional view of S-wave velocity perturbations calculated relative to the regional average (black line in Figure S10) below the Quaternary intraplate volcanic fields in NE China. Corresponding profile locations are indicated by the purple solid lines in Figure 1A.



## SYNTHETIC RESTORING TEST

To evaluate the reliability of our Vs inversion results, we conduct a synthetic restoring test to check whether we can robustly recover the primary imaging features interpreted in this study. The input model (Fig. S12A) is designed according to the imaged low/high Vs bodies shown in Figure 3C. The amplitude of input low/high Vs bodies are calculated relative to the regional average Vs at corresponding depths along the chosen profile. The upper and lower parts of the upper mantle low-velocity shapes beneath the CBS volcano are given a 6% and 5% Vs reduction, respectively. The high-velocity lid beneath the WDLC volcano and the small-scale low-velocity body atop are set with a 4% Vs increase and 4% Vs reduction, respectively. The bottom low-velocity shape beneath the WDLC volcano is given a 4% Vs reduction as well. The crustal region (above 40 km) is set with 1-D background Vs without perturbations.

We first generate synthetic phase velocity data based on the given input model and then perform the ambient noise tomography, earthquake two-plane wave tomography, and Vs inversion consecutively using the same ray path and inversion parameters as those applied to the real data. The output model (Fig. S12B) demonstrates that the input upper mantle velocity anomalies beneath the CBS and WDLC volcanoes, including the localized low-velocity body atop the high-velocity lid beneath the WDLC volcano, can all be adequately recovered, indicating that the main features we interpret in this study are well resolved, though some horizontal and vertical smearing effects occur surrounding the input velocity anomalies. The output model (Fig. S12B) shows that the input low-velocity anomalies in the uppermost mantle beneath the CBS and WDLC volcanoes appear to “leak” into the lower crust a little bit due to vertical smearing effects. Nevertheless, the background crustal structure is generally well recovered, especially for regions without underlying upper mantle velocity anomalies (Fig. S12).

It has been well documented that surface waves are mostly sensitive to lateral variations of Vs structures. As a result, vertical (depth) resolution in surface wave tomography is relatively lower compared to horizontal resolution, especially when it comes to layered anomalies with alternating positive and negative perturbations, which is the case of our synthetic restoring test as shown in Figure S12. On the other hand, however, we can see that the recovered high-



295 velocity body (Fig. S12B) does reflect the model feature, though being visibly smeared in  
 296 pattern and underestimated in amplitude compared to the input velocity anomaly (Fig. S12A).  
 297 This therefore suggests that the high-velocity lid imaged beneath the WDLC is a rather robust  
 298 feature, and that it may be even more prominent in reality than in the inversion result.

299

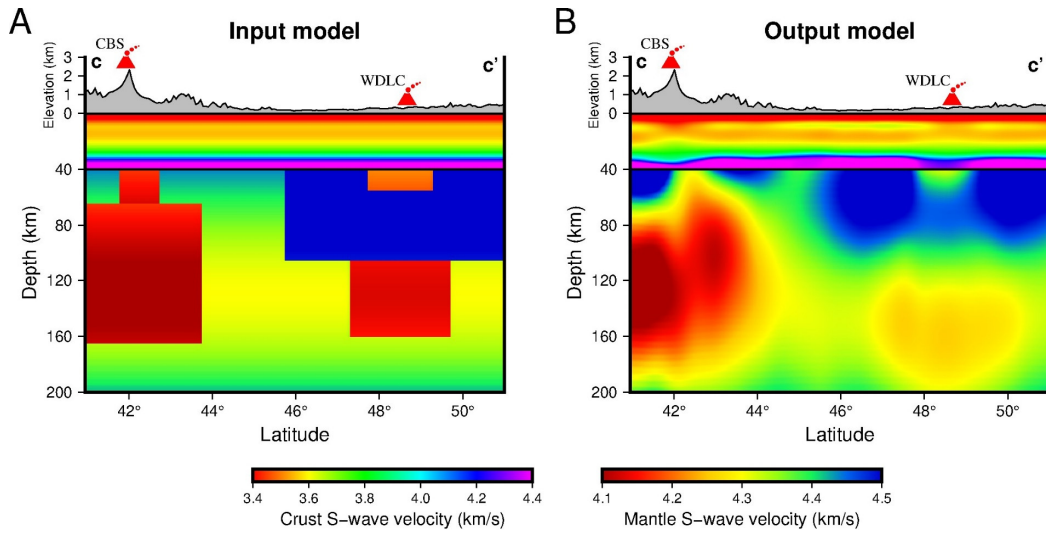

300

301 **Figure S12.** Synthetic restoring test. (A) Cross-section of the input model resembling the cc'  
 302 profile as depicted in Figure 3C. The amplitude of input low/high Vs bodies are calculated  
 303 relative to the regional average Vs (black line in Figure S10) at corresponding depths. (B) Cross-  
 304 section of the output model, which is obtained by generating synthetic phase velocity data  
 305 from the input model (A) and then performing the ambient noise tomography, two-plane wave  
 306 tomography, and Vs inversion consecutively using the same ray path and inversion parameters  
 307 as applied to the real data.

308

309



## 310 REFERENCES

- 311 Barmin, M.P., Ritzwoller, M.H., and Levshin, A.L., 2001, A fast and reliable method for surface  
312 wave tomography: Pure and Applied Geophysics, v. 158, p. 1351-1375,  
313 <https://doi.org/10.1007/Pl00001225>.
- 314 Bensen, G.D., Ritzwoller, M.H., Barmin, M.P., Levshin, A.L., Lin, F., Moschetti, M.P., Shapiro,  
315 N.M., and Yang, Y., 2007, Processing seismic ambient noise data to obtain reliable broad-  
316 band surface wave dispersion measurements: Geophysical Journal International, v. 169, p.  
317 1239-1260, <https://doi.org/10.1111/j.1365-246X.2007.03374.x>.
- 318 Birch, F., 1961, The velocity of compressional waves in rocks to 10 kilobars: 2.: Journal of  
319 Geophysical Research, v. 65, p. 2199-2224, <https://doi.org/10.1029/JZ066i007p02199>.
- 320 Dziewonski, A.M., and Anderson, D.L., 1981, Preliminary reference Earth model: Physics of the  
321 Earth and Planetary Interiors, v. 25, p. 297-356, [https://doi.org/10.1016/0031-](https://doi.org/10.1016/0031-9201(81)90046-7)  
322 9201(81)90046-7.
- 323 Forsyth, D.W., and Li, A., 2005, Small-scale convection and anisotropy in the mantle beneath  
324 southern California from high-resolution Rayleigh wave tomography: Seismic Earth: Array  
325 Analysis of Broadband Seismograms, v. 157, p. 81-97, <https://doi.org/10.1029/157GM06>.
- 326 Guo, Z., Chen, Y.J., Ning, J.Y., Yang, Y.J., Afonso, J.C., and Tang, Y.C., 2016, Seismic evidence of  
327 on-going sublithosphere upper mantle convection for intra-plate volcanism in Northeast  
328 China: Earth and Planetary Science Letters, v. 433, p. 31-43,  
329 <https://doi.org/10.1016/j.epsl.2015.09.035>.
- 330 He, R.Z., Shang, X.F., Yu, C.Q., Zhang, H.J., and Van der Hilst, R.D., 2014, A unified map of Moho  
331 depth and Vp/Vs ratio of continental China by receiver function analysis: Geophysical  
332 Journal International, v. 199, p. 1910-1918, <https://doi.org/10.1093/gji/ggu365>.
- 333 Laske, G., Masters, G., Ma, Z.T., and Pasyanos, M., 2013, Update on CRUST1.0—A 1-degree  
334 global model of Earth's crust: Geophysical Research Abstract, v. 15, p. Abstract EGU2013-  
335 2658.
- 336 Levshin, A.L., and Ritzwoller, M.H., 2001, Automated detection, extraction, and measurement  
337 of regional surface waves: Pure and Applied Geophysics, v. 158, p. 1531-1545,  
338 <https://doi.org/10.1007/Pl00001233>.



339 Lu, M.W., Lei, J.S., Zhao, D.P., Ai, Y.S., Xu, X.W., and Zhang, G.B., 2020, SKS splitting  
 340 measurements in NE China: New insights into the Wudalianchi intraplate volcanism and  
 341 mantle dynamics: *Journal of Geophysical Research: Solid Earth*, v. 125, p. e2019JB018575,  
 342 <https://doi.org/10.1029/2019JB018575>.  
 343 Peng, Y.B., Jiang, M.M., Ai, Y.S., 2019. Efficient scheme to extract Green functions of Rayleigh  
 344 wave from seismic noise via a Python library for seismology-ObsPy (In Chinese with English  
 345 abstract): *Progress in Geophysics*, v. 34, p. 919-927,  
 346 <https://doi.org/10.6038/pg2019CC0119>.  
 347 Ri, K.S., Hammond, J.O.S., Ko, C.N., Kim, H., Yun, Y.G., Pak, G.J., Ri, C.S., Oppenheimer, C., Liu,  
 348 K.W., Iacovino, K., and Ryu, K.R., 2016, Evidence for partial melt in the crust beneath Mt.  
 349 Paektu (Changbaishan), Democratic People's Republic of Korea and China: *Science*  
 350 *Advances*, v. 2, <https://doi.org/10.1126/sciadv.1501513>.  
 351 Tao, K., Niu, F.L., Ning, J.Y., Chen, Y.S.J., Grand, S., Kawakatsu, H., Tanaka, S., Obayashi, M., and  
 352 Ni, J., 2014, Crustal structure beneath NE China imaged by NECESSArray receiver function  
 353 data: *Earth and Planetary Science Letters*, v. 398, p. 48-57,  
 354 <https://doi.org/10.1016/j.epsl.2014.04.043>.  
 355 Wang, X., Chen, Q.F., Li, J., and Wei, S.J., 2016, Seismic sensor misorientation measurement  
 356 using P-wave particle motion: An application to the NECsaids Array: *Seismological*  
 357 *Research Letters*, v. 87, p. 901-911, <https://doi.org/10.1785/0220160005>.  
 358 Yang, Y.J., and Forsyth, D.W., 2006, Regional tomographic inversion of the amplitude and phase  
 359 of Rayleigh waves with 2-D sensitivity kernels: *Geophysical Journal International*, v. 166, p.  
 360 1148-1160, <https://doi.org/10.1111/j.1365-246X.2006.02972.x>.  
 361 Zhang, F.X., and Wu, Q.J., 2019, Velocity structure in upper mantle and its implications for the  
 362 volcanism nearby the north edge of Songliao Basin (In chinese with English abstract):  
 363 *Chinese Journal of Geophysics*, v. 62, p. 2918-2929,  
 364 <https://doi.org/10.6038/cjg2019M0665>.  
 365 Zhang, K.W., Chen, Q.F., and Chen, Y., 2020, Crustal structure beneath the southwestern  
 366 Xing'an-Mongolia Orogenic Belt revealed by receiver function analysis (In Chinese with  
 367 English abstract): *Chinese Journal of Geophysics*, v. 63, p. 1484-1504,



368       <https://doi.org/10.6038/cjg2020N0048>.  
369   Zheng, X.F., Yao, Z.X., Liang, J.H., and Zheng, J., 2010, The role played and opportunities  
370       provided by IGP DMC of China National Seismic Network in Wenchuan earthquake disaster  
371       relief and researches: Bulletin of the Seismological Society of America, v. 100, p. 2866-  
372       2872, <https://doi.org/10.1785/0120090257>.  
373   Zhou, Y., Dahlen, F.A., and Nolet, G., 2004, Three-dimensional sensitivity kernels for surface  
374       wave observables: Geophysical Journal International, v. 158, p. 142-168,  
375       <https://doi.org/10.1111/j.1365-246X.2004.02324.x>.  
376
